# Supplementary material
Source: MDPI journal article supplement (https://www.mdpi.com/2673-4125/1/4/27)
Supplement: s1 [file s1]

# Silver Binding to Bacterial Glutaredoxins Observed by NMR

Stephanie M. Bilinovich, Daniel L. Morris, Jeremy W. Prokop, Joel A. Caporoso, Alexandra Taraboletti, Nilubol Duangjumba, Matthew J Panzner, Leah P. Shriver, and Thomas C. Leeper

## Supplementary Data

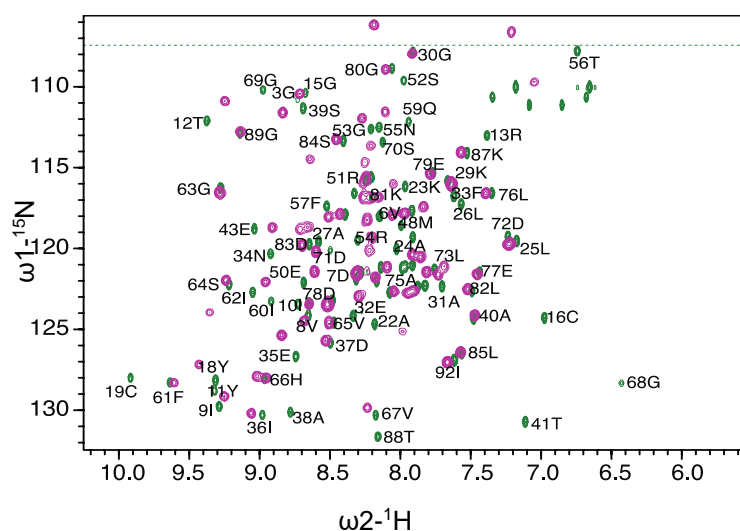

**Figure S1.** Chemical shift perturbation of Hg(II). Apo GRX (green) and 0.75eq Hg(II) (pink).

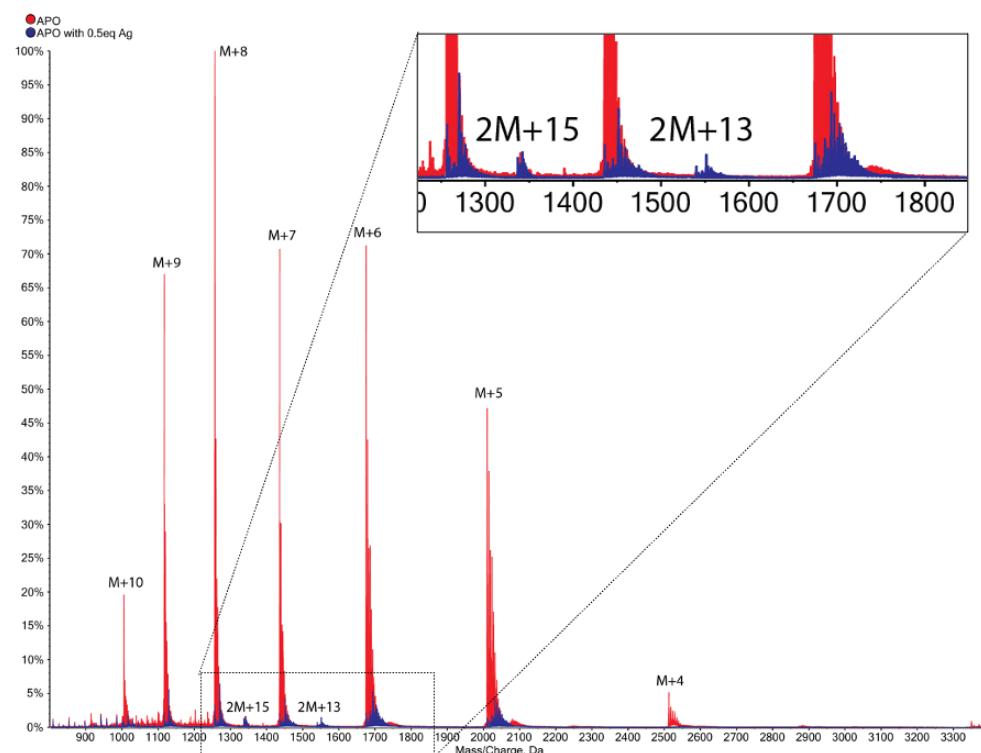

**Figure S2.** Overlapped ESI-MS spectra of apo protein (red) and silver metalated protein (blue). The charge distribution is labeled above the peak with “M” representative of the monomer mass, and “2M” representing the dimer mass. The Y-axis represents relative intensity and the inset highlights the overall reduction in ionization efficiency for the metalated protein and the presence of dimer peaks.

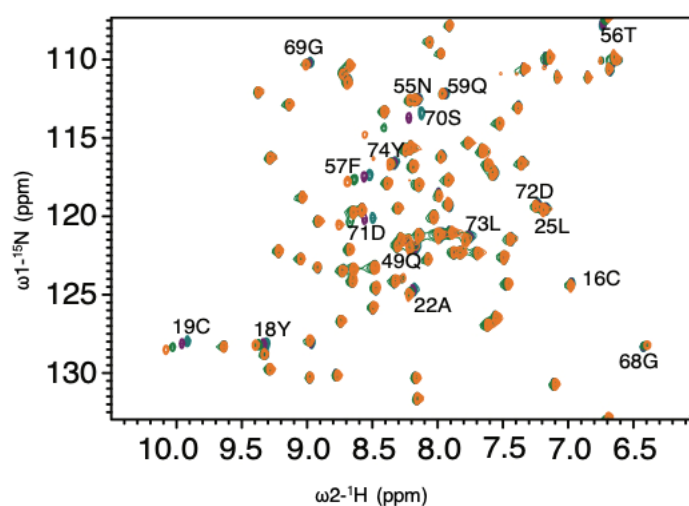

**Figure S3.** CSP with GSH. GRX titrated with increasing concentrations of GSH. 0 GSH (teal), 1mM GSH (purple), 3mM GSH (green), 5mM GSH (orange), only assignments for residues that shift in the presence of GSH are shown.

**Table S1.** Chemical shifts of the cysteine carbons in the active site.

| Amino Acid | C $\alpha$ Shift (ppm) | C $\beta$ shift (ppm) | C $\alpha$ Shift (ppm) | C $\beta$ shift (ppm) |
|------------|------------------------|-----------------------|------------------------|-----------------------|
|            | Apo                    | Apo                   | 0.5equiv. Ag           | 0.5equiv. Ag          |
| C-16       | 56.315                 | 31.724                | 55.24                  | 31.72                 |
| C-19       | 64.810                 | 29.498                | 64.47                  | 31.01                 |
